# Supplementary material
Source: PubMed Central journal article supplement (PMC6083850)
Supplement: NIHMS976446-supplement-Supplement.pdf [file NIHMS976446-supplement-Supplement.pdf]

## Supplementary webappendix

This webappendix formed part of the original submission and has been peer reviewed. We post it as supplied by the authors.

Supplement to: Eron JJ, Cooper DA, Steigbigel RT, et al, for the BENCHMRK Study Teams. Efficacy and safety of raltegravir for treatment of HIV for 5 years in the BENCHMRK studies: final results of two randomised, placebo-controlled trials. *Lancet Infect Dis* 2013; published online May 7. [http://dx.doi.org/10.1016/S1473-3099\(13\)70093-8](http://dx.doi.org/10.1016/S1473-3099(13)70093-8).

## **APPENDIX 1**

### Individual Study Results

1. BENCHMRK-1: Efficacy Analysis at Week 156 (Non-Completer=Failure)
2. BENCHMRK-2: Efficacy Analysis at Week 156 (Non-Completer=Failure)

BENCHMRK-1: Efficacy Analysis at Week 156  
(Non-Completer=Failure Approach<sup>†</sup>)

| Parameter                                                                                                      | Unadjusted Data Summary by Treatment Group <sup>‡</sup> |                      | Treatment Effect (Raltegravir 400 mg b.i.d. vs. Placebo) Adjusted for Prognostic Factors <sup>§</sup> |                      |         |
|----------------------------------------------------------------------------------------------------------------|---------------------------------------------------------|----------------------|-------------------------------------------------------------------------------------------------------|----------------------|---------|
|                                                                                                                | Raltegravir.<br>n/N(%)                                  | Placebo<br>n/N(%)    | Relative Effect                                                                                       | 95% CI<br>Odds Ratio | p-Value |
| Proportion of patients with HIV RNA <400 copies/mL                                                             | 133/232 (57.3)                                          | 30/117 (25.6)        | 4.8                                                                                                   | (2.82, 8.19)         | <0.001  |
| Proportion of patients with HIV RNA <50 copies/mL                                                              | 124/232 (53.4)                                          | 30/117 (25.6)        | 4.1                                                                                                   | (2.39, 6.90)         | <0.001  |
| Proportion of patients with >1 log <sub>10</sub> drop from baseline in HIV RNA or HIV RNA level <400 copies/mL | 136/232 (58.6)                                          | 32/117 (27.4)        | 4.6                                                                                                   | (2.73, 7.78)         | <0.001  |
|                                                                                                                | Mean (95% CI)                                           | Mean (95% CI)        |                                                                                                       | Mean Difference      |         |
| Change from Baseline in Log <sub>10</sub> HIV RNA (Log <sub>10</sub> copies/mL)                                | -1.44 (-1.60, -1.28)                                    | -0.51 (-0.67, -0.34) | -1.42                                                                                                 | (-1.82, -1.02)       | <0.001  |
| Change from Baseline in CD4 Cell Count (cells/mm <sup>3</sup> )                                                | 170.9 (144.4, 197.4)                                    | 71.03 (46.28, 95.77) | 99.04                                                                                                 | (59.28, 138.8)       | <0.001  |

<sup>†</sup> Approach to handling missing values: For binary endpoints (proportions), Non-Completer = Failure. For change from baseline in log<sub>10</sub> HIV RNA and change from baseline in CD4 cell counts, Observed Failure (OF) approach assumes baseline value was carried forward for patients who discontinued assigned therapy due to lack of efficacy.

<sup>‡</sup> For binary endpoints (proportions), n/N (%) were reported for each treatment group, where n/N=(number of responders) / (number of patients). For continuous endpoints (changes from baseline in log<sub>10</sub> HIV RNA level and CD4 cell count), mean changes with (95% CIs) were reported. Observed mean change from baseline in log<sub>10</sub> HIV RNA level for each group was calculated using the conventional imputation (replace HIV RNA <400 copies/mL by 400 copies/mL if signal detected, or 200 copies/mL if signal not detected). Normal distributions were assumed for continuous endpoints.

<sup>§</sup> For binary endpoints (proportions), odds ratio (95% CI) and p-value was calculated using a logistic regression model adjusted for: baseline HIV RNA level (log<sub>10</sub>), enfuvirtide use in OBT in enfuvirtide naïve patients, active PI in OBT determined by phenotypic resistance test, darunavir use in OBT in darunavir naïve patients, and treatment. An odds ratio of (<1, =1, >1) indicates that MK-0518 is (inferior, equivalent, superior) to Placebo. For change from baseline in log<sub>10</sub> HIV RNA level, difference (95% CI) and p-value were calculated using a parametric regression model (normal assumption), which can handle censored observation and is adjusted for: baseline HIV RNA level(log<sub>10</sub>), enfuvirtide use in OBT in enfuvirtide naïve patients, active PI in OBT determined by phenotypic resistance test, darunavir use in OBT in darunavir naïve patients, and treatment. For change from baseline in CD4 cell counts, difference (95% CI) and p-value were calculated using a mixed-effects model adjusted for: baseline CD4 cell count, stratum, treatment, visit, interactions between visit and previous variables.

**BENCHMRK-2: Efficacy Analysis at Week 156  
(Non-Completer=Failure Approach<sup>†</sup>)**

| Parameter                                                                                                      | Unadjusted Data Summary by Treatment Group <sup>‡</sup> |                      | Treatment Effect (Raltegravir 400 mg b.i.d. vs. Placebo) Adjusted for Prognostic Factors <sup>§</sup> |                      |         |
|----------------------------------------------------------------------------------------------------------------|---------------------------------------------------------|----------------------|-------------------------------------------------------------------------------------------------------|----------------------|---------|
|                                                                                                                | Raltegravir<br>n/N(%)                                   | Placebo<br>n/N(%)    | Relative Effect                                                                                       | 95% CI<br>Odds Ratio | p-Value |
| Proportion of patients with HIV RNA <400 copies/mL                                                             | 115/229 (50.2)                                          | 25/119 (21.0)        | 4.2                                                                                                   | (2.45, 7.20)         | <0.001  |
| Proportion of patients with HIV RNA <50 copies/mL                                                              | 109/229 (47.6)                                          | 21/119 (17.6)        | 4.8                                                                                                   | (2.71, 8.39)         | <0.001  |
| Proportion of patients with >1 log <sub>10</sub> drop from baseline in HIV RNA or HIV RNA level <400 copies/mL | 118/229 (51.5)                                          | 25/119 (21.0)        | 4.4                                                                                                   | (2.55, 7.46)         | <0.001  |
|                                                                                                                | Mean (95% CI)                                           | Mean (95% CI)        |                                                                                                       | Mean Difference      |         |
| Change from Baseline in Log <sub>10</sub> HIV RNA (Log <sub>10</sub> copies/mL)                                | -1.37 (-1.55, -1.20)                                    | -0.52 (-0.71, -0.33) | -1.14                                                                                                 | (-1.54, -0.75)       | <0.001  |
| Change from Baseline in CD4 Cell Count (cells/mm <sup>3</sup> )                                                | 157.2 (130.7, 183.6)                                    | 54.17 (30.04, 78.30) | 103.3                                                                                                 | (63.33, 143.3)       | <0.001  |

<sup>†</sup> Approach to handling missing values: For binary endpoints (proportions), Non-Completer = Failure. For change from baseline in log<sub>10</sub> HIV RNA and change from baseline in CD4 cell counts, Observed Failure (OF) approach assumes baseline value was carried forward for patients who discontinued assigned therapy due to lack of efficacy.

<sup>‡</sup> For binary endpoints (proportions), n/N (%) were reported for each treatment group, where n/N=(number of responders) / (number of patients). For continuous endpoints (changes from baseline in log<sub>10</sub> HIV RNA level and CD4 cell count), mean changes with (95% CIs) were reported. Observed mean change from baseline in log<sub>10</sub> HIV RNA level for each group was calculated using the conventional imputation (replace HIV RNA <400 copies/mL by 400 copies/mL if signal detected, or 200 copies/mL if signal not detected). Normal distributions were assumed for continuous endpoints.

<sup>§</sup> For binary endpoints (proportions), odds ratio (95% CI) and p-value was calculated using a logistic regression model adjusted for: baseline HIV RNA level (log<sub>10</sub>), enfuvirtide use in OBT in enfuvirtide naïve patients, active PI in OBT determined by phenotypic resistance test, darunavir use in OBT in darunavir naïve patients, and treatment. An odds ratio of (<1, =1, >1) indicates that MK-0518 is (inferior, equivalent, superior) to Placebo. For change from baseline in log<sub>10</sub> HIV RNA level, difference (95% CI) and p-value were calculated using a parametric regression model (normal assumption), which can handle censored observation and is adjusted for: baseline HIV RNA level(log<sub>10</sub>), enfuvirtide use in OBT in enfuvirtide naïve patients, active PI in OBT determined by phenotypic resistance test, darunavir use in OBT in darunavir naïve patients, and treatment. For change from baseline in CD4 cell counts, difference (95% CI) and p-value were calculated using a mixed-effects model adjusted for: baseline CD4 cell count, stratum, treatment, visit, interactions between visit and previous variables.

## **APPENDIX 2**

### Week 156 Subgroup Analyses

1. Proportion of Patients With Plasma HIV RNA <50 Copies/mL by Prognostic Factors (Observed Failure Approach)
2. Proportion of Patients With Plasma HIV RNA <50 Copies/mL by Demographic Factors (Observed Failure Approach)
3. Change From Baseline in CD4 Cell Count (Cells/mm<sup>3</sup>) by Prognostic Factors (Observed Failure Approach)
4. Change From Baseline in CD4 Cell Count (Cells/mm<sup>3</sup>) by Demographic Factors (Observed Failure Approach)

**Table 1**  
Proportion of Patients With Plasma HIV RNA <50 Copies/mL at Week 156  
by Prognostic Factors (Observed Failure Approach)

| Prognostic Factor                                                                                                                                                                                                                                                                                                                                                                                                                                                                                                                                                                                                                                     | Response          |                   |               |                   | Difference in Response % (95% CI) |
|-------------------------------------------------------------------------------------------------------------------------------------------------------------------------------------------------------------------------------------------------------------------------------------------------------------------------------------------------------------------------------------------------------------------------------------------------------------------------------------------------------------------------------------------------------------------------------------------------------------------------------------------------------|-------------------|-------------------|---------------|-------------------|-----------------------------------|
|                                                                                                                                                                                                                                                                                                                                                                                                                                                                                                                                                                                                                                                       | Raltegravir + OBT |                   | Placebo + OBT |                   |                                   |
|                                                                                                                                                                                                                                                                                                                                                                                                                                                                                                                                                                                                                                                       | n/N               | % (95% CI)        | n/N           | % (95% CI)        |                                   |
| <b>Total</b>                                                                                                                                                                                                                                                                                                                                                                                                                                                                                                                                                                                                                                          | 233/396           | 58.8 (53.8, 63.7) | 51/209        | 24.4 (18.7, 30.8) | 34.4 (26.6, 41.7)                 |
| <b>Baseline Plasma HIV RNA (copies/mL)</b>                                                                                                                                                                                                                                                                                                                                                                                                                                                                                                                                                                                                            |                   |                   |               |                   |                                   |
| ≤ 50,000                                                                                                                                                                                                                                                                                                                                                                                                                                                                                                                                                                                                                                              | 128/181           | 70.7 (63.5, 77.2) | 38/104        | 36.5 (27.3, 46.6) | 34.2 (22.4, 45.0)                 |
| > 50,000                                                                                                                                                                                                                                                                                                                                                                                                                                                                                                                                                                                                                                              | 105/215           | 48.8 (42.0, 55.7) | 13/105        | 12.4 (6.8, 20.2)  | 36.5 (26.6, 45.1)                 |
| <b>Baseline Plasma HIV RNA (copies/mL)</b>                                                                                                                                                                                                                                                                                                                                                                                                                                                                                                                                                                                                            |                   |                   |               |                   |                                   |
| ≤ 100,000                                                                                                                                                                                                                                                                                                                                                                                                                                                                                                                                                                                                                                             | 169/250           | 67.6 (61.4, 73.4) | 44/137        | 32.1 (24.4, 40.6) | 35.5 (25.4, 44.8)                 |
| > 100,000                                                                                                                                                                                                                                                                                                                                                                                                                                                                                                                                                                                                                                             | 64/146            | 43.8 (35.6, 52.3) | 7/72          | 9.7 (4.0, 19.0)   | 34.1 (22.5, 44.0)                 |
| <b>Baseline CD4 Cell Counts (cells/mm<sup>3</sup>)</b>                                                                                                                                                                                                                                                                                                                                                                                                                                                                                                                                                                                                |                   |                   |               |                   |                                   |
| ≤ 50                                                                                                                                                                                                                                                                                                                                                                                                                                                                                                                                                                                                                                                  | 55/126            | 43.7 (34.8, 52.8) | 9/72          | 12.5 (5.9, 22.4)  | 31.2 (18.7, 42.1)                 |
| > 50 and ≤ 200                                                                                                                                                                                                                                                                                                                                                                                                                                                                                                                                                                                                                                        | 91/147            | 61.9 (53.5, 69.8) | 17/71         | 23.9 (14.6, 35.5) | 38.0 (24.4, 49.6)                 |
| > 200                                                                                                                                                                                                                                                                                                                                                                                                                                                                                                                                                                                                                                                 | 87/123            | 70.7 (61.9, 78.6) | 25/66         | 37.9 (26.2, 50.7) | 32.9 (18.1, 46.2)                 |
| <b>Enfuvirtide Use in OBT</b>                                                                                                                                                                                                                                                                                                                                                                                                                                                                                                                                                                                                                         |                   |                   |               |                   |                                   |
| No                                                                                                                                                                                                                                                                                                                                                                                                                                                                                                                                                                                                                                                    | 138/251           | 55.0 (48.6, 61.2) | 29/136        | 21.3 (14.8, 29.2) | 33.7 (24.0, 42.4)                 |
| Yes in enfuvirtide exp. pts                                                                                                                                                                                                                                                                                                                                                                                                                                                                                                                                                                                                                           | 40/75             | 53.3 (41.4, 64.9) | 5/36          | 13.9 (4.7, 29.5)  | 39.4 (21.3, 53.7)                 |
| Yes in enfuvirtide naïve pts                                                                                                                                                                                                                                                                                                                                                                                                                                                                                                                                                                                                                          | 55/70             | 78.6 (67.1, 87.5) | 17/37         | 45.9 (29.5, 63.1) | 32.6 (13.6, 50.2)                 |
| <b>Darunavir Use in OBT</b>                                                                                                                                                                                                                                                                                                                                                                                                                                                                                                                                                                                                                           |                   |                   |               |                   |                                   |
| No                                                                                                                                                                                                                                                                                                                                                                                                                                                                                                                                                                                                                                                    | 140/251           | 55.8 (49.4, 62.0) | 23/132        | 17.4 (11.4, 25.0) | 38.4 (28.9, 46.8)                 |
| Yes in Darunavir exp. pts                                                                                                                                                                                                                                                                                                                                                                                                                                                                                                                                                                                                                             | 2/18              | 11.1 (1.4, 34.7)  | 0/9           | 0.0 (0.0, 33.6)   | 11.1 (-20.9, 33.3)                |
| Yes in Darunavir naïve pts                                                                                                                                                                                                                                                                                                                                                                                                                                                                                                                                                                                                                            | 91/127            | 71.7 (63.0, 79.3) | 28/68         | 41.2 (29.4, 53.8) | 30.5 (16.0, 43.9)                 |
| <b>Number of Active PI in OBT by Phenotypic Resistance Test<sup>†</sup></b>                                                                                                                                                                                                                                                                                                                                                                                                                                                                                                                                                                           |                   |                   |               |                   |                                   |
| 0                                                                                                                                                                                                                                                                                                                                                                                                                                                                                                                                                                                                                                                     | 68/152            | 44.7 (36.7, 53.0) | 7/93          | 7.5 (3.1, 14.9)   | 37.2 (27.1, 46.4)                 |
| 1 or more                                                                                                                                                                                                                                                                                                                                                                                                                                                                                                                                                                                                                                             | 156/226           | 69.0 (62.6, 75.0) | 43/112        | 38.4 (29.4, 48.1) | 30.6 (19.5, 41.0)                 |
| Missing                                                                                                                                                                                                                                                                                                                                                                                                                                                                                                                                                                                                                                               | 9/18              | 50.0 (26.0, 74.0) | 1/4           | 25.0 (0.6, 80.6)  | 25.0 (-27.5, 58.6)                |
| <b>Phenotypic Sensitivity Score (PSS)<sup>‡</sup></b>                                                                                                                                                                                                                                                                                                                                                                                                                                                                                                                                                                                                 |                   |                   |               |                   |                                   |
| 0                                                                                                                                                                                                                                                                                                                                                                                                                                                                                                                                                                                                                                                     | 26/61             | 42.6 (30.0, 55.9) | 2/43          | 4.7 (0.6, 15.8)   | 38.0 (23.0, 51.5)                 |
| 1                                                                                                                                                                                                                                                                                                                                                                                                                                                                                                                                                                                                                                                     | 76/126            | 60.3 (51.2, 68.9) | 13/64         | 20.3 (11.3, 32.2) | 40.0 (25.9, 51.9)                 |
| 2                                                                                                                                                                                                                                                                                                                                                                                                                                                                                                                                                                                                                                                     | 81/123            | 65.9 (56.8, 74.2) | 17/58         | 29.3 (18.1, 42.7) | 36.5 (21.2, 49.8)                 |
| 3 or more                                                                                                                                                                                                                                                                                                                                                                                                                                                                                                                                                                                                                                             | 39/64             | 60.9 (47.9, 72.9) | 16/37         | 43.2 (27.1, 60.5) | 17.7 (-2.5, 36.6)                 |
| Missing                                                                                                                                                                                                                                                                                                                                                                                                                                                                                                                                                                                                                                               | 11/22             | 50.0 (28.2, 71.8) | 3/7           | 42.9 (9.9, 81.6)  | 7.1 (-32.6, 43.1)                 |
| <b>Genotypic Sensitivity Score (GSS)<sup>‡</sup></b>                                                                                                                                                                                                                                                                                                                                                                                                                                                                                                                                                                                                  |                   |                   |               |                   |                                   |
| 0                                                                                                                                                                                                                                                                                                                                                                                                                                                                                                                                                                                                                                                     | 41/110            | 37.3 (28.2, 47.0) | 3/64          | 4.7 (1.0, 13.1)   | 32.6 (21.4, 42.8)                 |
| 1                                                                                                                                                                                                                                                                                                                                                                                                                                                                                                                                                                                                                                                     | 103/149           | 69.1 (61.0, 76.4) | 19/84         | 22.6 (14.2, 33.0) | 46.5 (34.0, 57.2)                 |
| 2                                                                                                                                                                                                                                                                                                                                                                                                                                                                                                                                                                                                                                                     | 62/91             | 68.1 (57.5, 77.5) | 19/37         | 51.4 (34.4, 68.1) | 16.8 (-1.6, 35.0)                 |
| 3 or more                                                                                                                                                                                                                                                                                                                                                                                                                                                                                                                                                                                                                                             | 23/40             | 57.5 (40.9, 73.0) | 9/20          | 45.0 (23.1, 68.5) | 12.5 (-14.0, 37.4)                |
| Missing                                                                                                                                                                                                                                                                                                                                                                                                                                                                                                                                                                                                                                               | 4/6               | 66.7 (22.3, 95.7) | 1/4           | 25.0 (0.6, 80.6)  | 41.7 (-23.1, 80.2)                |
| <sup>†</sup> Darunavir use in OBT in darunavir-naïve patients was counted as one active PI.<br><sup>‡</sup> The Phenotypic Sensitivity Score (PSS) and the Genotypic Sensitivity Score (GSS) were defined as the total oral ARTs in OBT to which a patient's viral isolate showed phenotypic sensitivity and genotypic sensitivity, respectively, based upon phenotypic and genotypic resistance tests. Enfuvirtide use in OBT in enfuvirtide-naïve patients was counted as one active drug in OBT and added to the GSS and PSS. Darunavir use in OBT in darunavir-naïve patients was counted as one active drug in OBT and added to the PSS and GSS. |                   |                   |               |                   |                                   |

**Table 2**  
Proportion of Patients With Plasma HIV RNA <50 Copies/mL at Week 156  
by Demographic Factors (Observed Failure Approach)

| OBT Factor                                           | Response                       |                     |                            |                   | Difference in Percent Response<br>[Group A Minus Group B] |
|------------------------------------------------------|--------------------------------|---------------------|----------------------------|-------------------|-----------------------------------------------------------|
|                                                      | Raltegravir + OBT<br>(Group A) |                     | Placebo + OBT<br>(Group B) |                   |                                                           |
|                                                      | n/N                            | % (95% CI)          | n/N                        | % (95% CI)        | % (95% CI)                                                |
| <b>Total</b>                                         | 233/396                        | 58.8 (53.8, 63.7)   | 51/209                     | 24.4 (18.7, 30.8) | 34.4 (26.6, 41.7)                                         |
| <b>Age (years)</b>                                   |                                |                     |                            |                   |                                                           |
| 16-64                                                | 226/389                        | 58.1 (53.0, 63.1)   | 51/208                     | 24.5 (18.8, 30.9) | 33.6 (25.7, 40.9)                                         |
| ≥65                                                  | 7/7                            | 100.0 (59.0, 100.0) | 0/1                        | 0.0 (0.0, 97.5)   | 100.0 (18.6, 100.0)                                       |
| <b>Age (years)</b>                                   |                                |                     |                            |                   |                                                           |
| ≤median                                              | 114/208                        | 54.8 (47.8, 61.7)   | 26/117                     | 22.2 (15.1, 30.8) | 32.6 (21.9, 42.2)                                         |
| >median                                              | 119/188                        | 63.3 (56.0, 70.2)   | 25/92                      | 27.2 (18.4, 37.4) | 36.1 (24.1, 46.8)                                         |
| <b>Gender</b>                                        |                                |                     |                            |                   |                                                           |
| Female                                               | 27/51                          | 52.9 (38.5, 67.1)   | 7/27                       | 25.9 (11.1, 46.3) | 27.0 (3.8, 46.3)                                          |
| Male                                                 | 206/345                        | 59.7 (54.3, 64.9)   | 44/182                     | 24.2 (18.1, 31.1) | 35.5 (27.1, 43.3)                                         |
| <b>Race</b>                                          |                                |                     |                            |                   |                                                           |
| White                                                | 145/250                        | 58.0 (51.6, 64.2)   | 38/152                     | 25.0 (18.3, 32.7) | 33.0 (23.4, 41.8)                                         |
| Black                                                | 31/57                          | 54.4 (40.7, 67.6)   | 4/22                       | 18.2 (5.2, 40.3)  | 36.2 (12.3, 53.8)                                         |
| Asian                                                | 12/15                          | 80.0 (51.9, 95.7)   | 2/6                        | 33.3 (4.3, 77.7)  | 46.7 (0.9, 77.4)                                          |
| Hispanic                                             | 27/48                          | 56.3 (41.2, 70.5)   | 1/16                       | 6.3 (0.2, 30.2)   | 50.0 (24.7, 65.4)                                         |
| Native American                                      | 1/1                            | 100.0 (2.5, 100.0)  |                            |                   | 100.0 (0.0, 100.0)                                        |
| Others                                               | 17/25                          | 68.0 (46.5, 85.1)   | 6/13                       | 46.2 (19.2, 74.9) | 21.8 (-10.7, 51.2)                                        |
| <b>Region</b>                                        |                                |                     |                            |                   |                                                           |
| North America                                        | 86/153                         | 56.2 (48.0, 64.2)   | 17/83                      | 20.5 (12.4, 30.8) | 35.7 (23.2, 46.6)                                         |
| South America                                        | 40/58                          | 69.0 (55.5, 80.5)   | 10/30                      | 33.3 (17.3, 52.8) | 35.6 (13.7, 54.1)                                         |
| Asia Pacific                                         | 26/34                          | 76.5 (58.8, 89.3)   | 9/16                       | 56.3 (29.9, 80.2) | 20.2 (-6.8, 47.2)                                         |
| Europe                                               | 81/151                         | 53.6 (45.4, 61.8)   | 15/80                      | 18.8 (10.9, 29.0) | 34.9 (22.4, 45.8)                                         |
| <b>Viral Subtype</b>                                 |                                |                     |                            |                   |                                                           |
| Clade B                                              | 207/357                        | 58.0 (52.7, 63.2)   | 45/193                     | 23.3 (17.5, 29.9) | 34.7 (26.5, 42.2)                                         |
| non-Clade B                                          | 22/34                          | 64.7 (46.5, 80.3)   | 5/14                       | 35.7 (12.8, 64.9) | 29.0 (-2.1, 54.6)                                         |
| <b>Hepatitis B and/or C co-infection<sup>†</sup></b> |                                |                     |                            |                   |                                                           |
| No                                                   | 195/337                        | 57.9 (52.4, 63.2)   | 46/175                     | 26.3 (19.9, 33.5) | 31.6 (22.9, 39.6)                                         |
| Yes                                                  | 38/61                          | 62.3 (49.0, 74.4)   | 5/34                       | 14.7 (5.0, 31.1)  | 47.6 (28.2, 62.5)                                         |

<sup>†</sup> Hepatitis B surface antigen positive or hepatitis C antibody positive.

**Table 3**  
Change From Baseline in CD4 Cell Count (Cells/mm<sup>3</sup>) at Week 156 by Prognostic Factors  
(Observed Failure Approach)

| Prognostic Factor                                                           | Response                    |               |                                    |                         |               |                                    | Difference in Response<br>[Group A Minus Group B] |
|-----------------------------------------------------------------------------|-----------------------------|---------------|------------------------------------|-------------------------|---------------|------------------------------------|---------------------------------------------------|
|                                                                             | Raltegravir + OBT (Group A) |               |                                    | Placebo + OBT (Group B) |               |                                    |                                                   |
|                                                                             | N                           | Baseline Mean | Mean Change From Baseline (95% CI) | N                       | Baseline Mean | Mean Change From Baseline (95% CI) |                                                   |
| <b>Total</b>                                                                | 396                         | 150.8         | 164.3 ( 145.7, 183.0)              | 208                     | 156.7         | 62.8 ( 45.6, 80.0)                 | 101.5 ( 76.2, 126.8)                              |
| <b>Baseline Plasma HIV RNA (copies/mL)</b>                                  |                             |               |                                    |                         |               |                                    |                                                   |
| ≤ 50,000                                                                    | 181                         | 226.5         | 160.3 ( 134.1, 186.5)              | 103                     | 233.2         | 88.2 ( 61.4, 115.1)                | 72.1 ( 34.8, 109.5)                               |
| > 50,000                                                                    | 215                         | 87.1          | 167.7 ( 141.2, 194.3)              | 105                     | 81.7          | 38.0 ( 17.0, 58.9)                 | 129.8 ( 96.1, 163.5)                              |
| <b>Baseline Plasma HIV RNA (copies/mL)</b>                                  |                             |               |                                    |                         |               |                                    |                                                   |
| ≤ 100,000                                                                   | 250                         | 197.5         | 162.8 ( 140.2, 185.3)              | 136                     | 201.2         | 78.4 ( 56.1, 100.7)                | 84.3 ( 52.7, 115.9)                               |
| > 100,000                                                                   | 146                         | 70.9          | 167.1 ( 133.9, 200.2)              | 72                      | 72.7          | 33.4 ( 7.8, 59.0)                  | 133.7 ( 92.0, 175.3)                              |
| <b>Baseline CD4 Cell Counts (cells/mm<sup>3</sup>)</b>                      |                             |               |                                    |                         |               |                                    |                                                   |
| ≤ 50                                                                        | 127                         | 17.3          | 161.2 ( 126.2, 196.3)              | 72                      | 20.0          | 40.6 ( 13.1, 68.0)                 | 120.7 ( 76.4, 164.9)                              |
| > 50 and ≤ 200                                                              | 147                         | 123.3         | 161.3 ( 132.4, 190.2)              | 71                      | 123.8         | 66.7 ( 35.8, 97.5)                 | 94.6 ( 52.6, 136.6)                               |
| > 200                                                                       | 122                         | 323.1         | 171.3 ( 136.7, 205.8)              | 65                      | 344.0         | 83.3 ( 51.6, 115.1)                | 87.9 ( 41.4, 134.5)                               |
| <b>Enfuvirtide Use in OBT</b>                                               |                             |               |                                    |                         |               |                                    |                                                   |
| No                                                                          | 251                         | 156.1         | 155.2 ( 132.1, 178.3)              | 135                     | 164.2         | 59.9 ( 38.0, 81.7)                 | 95.3 ( 63.6, 127.0)                               |
| Yes (enfuvirtide exp. pts)                                                  | 75                          | 121.5         | 167.2 ( 121.5, 212.8)              | 36                      | 65.9          | 43.5 ( 1.9, 85.0)                  | 123.7 ( 62.7, 184.6)                              |
| Yes (enfuvirtide naïve pts)                                                 | 70                          | 163.5         | 194.3 ( 149.1, 239.5)              | 37                      | 217.8         | 92.5 ( 53.7, 131.4)                | 101.7 ( 42.9, 160.6)                              |
| <b>Darunavir Use in OBT</b>                                                 |                             |               |                                    |                         |               |                                    |                                                   |
| No                                                                          | 250                         | 163.4         | 161.4 ( 137.8, 184.9)              | 132                     | 169.2         | 46.3 ( 28.1, 64.6)                 | 115.1 ( 85.4, 144.8)                              |
| Yes (Darunavir exp. pts)                                                    | 18                          | 72.1          | 33.9 ( -5.2, 73.1)                 | 9                       | 117.1         | 0.0 ( 0.0, 0.0)                    | 33.9 ( -5.2, 73.1)                                |
| Yes (Darunavir naïve pts)                                                   | 128                         | 137.3         | 188.5 ( 154.8, 222.2)              | 67                      | 137.4         | 103.8 ( 65.6, 142.0)               | 84.6 ( 34.1, 135.2)                               |
| <b>Number of Active PI in OBT by Phenotypic Resistance Test<sup>†</sup></b> |                             |               |                                    |                         |               |                                    |                                                   |
| 0                                                                           | 151                         | 141.5         | 127.5 ( 98.4, 156.6)               | 93                      | 157.1         | 23.7 ( 7.0, 40.4)                  | 103.8 ( 70.4, 137.2)                              |
| 1 or more                                                                   | 227                         | 155.4         | 188.5 ( 163.6, 213.4)              | 111                     | 156.1         | 96.8 ( 69.1, 124.5)                | 91.7 ( 54.6, 128.8)                               |
| Missing                                                                     | 18                          | 171.4         | 169.0 ( 71.0, 267.0)               | 4                       | 165.0         | 30.8 ( -67.1, 128.6)               | 138.3 ( 20.6, 255.9)                              |
| <b>Phenotypic Sensitivity Score(PSS)<sup>‡</sup></b>                        |                             |               |                                    |                         |               |                                    |                                                   |
| 0                                                                           | 61                          | 144.8         | 124.3 ( 79.1, 169.4)               | 43                      | 152.9         | 18.0 ( -8.7, 44.6)                 | 106.3 ( 54.4, 158.2)                              |
| 1                                                                           | 125                         | 159.9         | 170.3 ( 135.0, 205.6)              | 64                      | 151.8         | 61.2 ( 29.4, 93.1)                 | 109.0 ( 61.9, 156.2)                              |
| 2                                                                           | 123                         | 127.0         | 193.5 ( 160.3, 226.7)              | 57                      | 169.4         | 68.2 ( 34.8, 101.6)                | 125.3 ( 78.6, 172.0)                              |
| 3 or more                                                                   | 65                          | 177.8         | 135.5 ( 90.8, 180.2)               | 37                      | 147.7         | 104.8 ( 54.8, 154.8)               | 30.7 ( -35.5, 96.8)                               |
| Missing                                                                     | 22                          | 170.3         | 164.1 ( 80.4, 247.8)               | 7                       | 169.0         | 87.7 ( -20.5, 195.9)               | 76.4 ( -49.9, 202.7)                              |
| <b>Genotypic Sensitivity Score(GSS)<sup>‡</sup></b>                         |                             |               |                                    |                         |               |                                    |                                                   |
| 0                                                                           | 110                         | 123.0         | 116.3 ( 83.2, 149.5)               | 64                      | 150.9         | 14.1 ( -4.1, 32.2)                 | 102.2 ( 64.6, 139.9)                              |
| 1                                                                           | 149                         | 161.9         | 189.0 ( 158.5, 219.5)              | 83                      | 158.0         | 56.2 ( 29.6, 82.8)                 | 132.8 ( 92.6, 173.1)                              |
| 2                                                                           | 91                          | 143.3         | 210.4 ( 167.9, 252.8)              | 37                      | 157.0         | 138.9 ( 87.5, 190.4)               | 71.4 ( 5.5, 137.4)                                |
| 3 or more                                                                   | 40                          | 202.9         | 90.0 ( 46.7, 133.2)                | 20                      | 170.5         | 105.3 ( 36.7, 173.9)               | -15.3 ( -94.8, 64.1)                              |
| Missing                                                                     | 6                           | 154.5         | 230.0 ( -12.1, 472.1)              | 4                       | 151.3         | 64.5 ( -140.8, 269.8)              | 165.5 ( -98.4, 429.4)                             |

<sup>†</sup> Darunavir use in OBT in darunavir naïve patients was counted as one active PI.

<sup>‡</sup> The Phenotypic Sensitivity Score (PSS) and the Genotypic Sensitivity Score (GSS) were defined as the total oral ARTs in OBT to which a patients viral isolate showed phenotypic sensitivity and genotypic sensitivity, respectively, based upon phenotypic and genotypic resistance tests. Enfuvirtide use in OBT in enfuvirtide-naïve patients was counted as one active drug in OBT and added to the GSS and PSS. Darunavir use in OBT in darunavir-naïve patients was counted as one active drug in OBT and added to the PSS and GSS.



**Table 4**  
**Change From Baseline in CD4 Cell Count (Cells/mm<sup>3</sup>) at Week 156 by Demographic Factors**  
**(Observed Failure Approach)**

| OBT Factor                                           | Response                    |               |                                    |                         |               |                                    | Difference in Response<br>[Group A Minus Group B]<br>(95% CI) |
|------------------------------------------------------|-----------------------------|---------------|------------------------------------|-------------------------|---------------|------------------------------------|---------------------------------------------------------------|
|                                                      | Raltegravir + OBT (Group A) |               |                                    | Placebo + OBT (Group B) |               |                                    |                                                               |
|                                                      | N                           | Baseline Mean | Mean Change From Baseline (95% CI) | N                       | Baseline Mean | Mean Change From Baseline (95% CI) |                                                               |
| <b>Total</b>                                         | 396                         | 150.8         | 164.3 ( 145.7, 183.0)              | 208                     | 156.7         | 62.8 ( 45.6, 80.0)                 | 101.5 ( 76.2, 126.8)                                          |
| <b>Age (years)</b>                                   |                             |               |                                    |                         |               |                                    |                                                               |
| 16-64                                                | 389                         | 149.4         | 165.9 ( 146.9, 184.8)              | 207                     | 156.8         | 62.7 ( 45.4, 80.0)                 | 103.2 ( 77.6, 128.8)                                          |
| ≥65                                                  | 7                           | 230.9         | 80.9 ( 16.3, 145.4)                | 1                       | 130.0         | 94.0 (N/A)                         | -13.1 (N/A)                                                   |
| <b>Age (years)</b>                                   |                             |               |                                    |                         |               |                                    |                                                               |
| ≤median                                              | 209                         | 144.8         | 162.7 ( 135.6, 189.7)              | 117                     | 155.5         | 56.4 ( 34.4, 78.3)                 | 106.3 ( 71.6, 141.0)                                          |
| >median                                              | 187                         | 157.6         | 166.2 ( 140.4, 192.0)              | 91                      | 158.3         | 71.1 ( 43.4, 98.9)                 | 95.1 ( 57.4, 132.8)                                           |
| <b>Gender</b>                                        |                             |               |                                    |                         |               |                                    |                                                               |
| Female                                               | 51                          | 165.1         | 201.0 ( 140.2, 261.7)              | 26                      | 134.7         | 76.0 ( 8.9, 143.1)                 | 125.0 ( 36.2, 213.8)                                          |
| Male                                                 | 345                         | 148.7         | 158.9 ( 139.4, 178.5)              | 182                     | 159.8         | 61.0 ( 43.5, 78.4)                 | 98.0 ( 71.8, 124.1)                                           |
| <b>Race</b>                                          |                             |               |                                    |                         |               |                                    |                                                               |
| White                                                | 250                         | 153.2         | 151.2 ( 128.9, 173.6)              | 152                     | 153.7         | 70.1 ( 48.2, 91.9)                 | 81.2 ( 50.0, 112.3)                                           |
| Black                                                | 57                          | 118.1         | 184.3 ( 130.9, 237.8)              | 21                      | 107.8         | 17.9 ( -4.8, 40.5)                 | 166.5 ( 109.0, 223.9)                                         |
| Asian                                                | 15                          | 79.5          | 252.5 ( 163.2, 341.9)              | 6                       | 165.5         | 41.8 ( -26.2, 109.9)               | 210.7 ( 107.4, 314.0)                                         |
| Hispanic                                             | 48                          | 174.5         | 159.3 ( 98.2, 220.4)               | 16                      | 249.3         | 11.3 ( -11.4, 34.0)                | 148.0 ( 83.6, 212.5)                                          |
| Native American                                      | 1                           | 97.0          | 483.0 (N/A)                        |                         |               |                                    | (N/A)                                                         |
| Others                                               | 25                          | 201.1         | 194.0 ( 106.6, 281.4)              | 13                      | 153.2         | 124.2 ( 40.6, 207.8)               | 69.8 ( -46.4, 185.9)                                          |
| <b>Region</b>                                        |                             |               |                                    |                         |               |                                    |                                                               |
| North America                                        | 153                         | 130.0         | 164.2 ( 133.8, 194.7)              | 82                      | 126.3         | 52.5 ( 26.9, 78.2)                 | 111.7 ( 72.1, 151.3)                                          |
| South America                                        | 58                          | 212.8         | 180.0 ( 128.4, 231.7)              | 30                      | 242.6         | 92.6 ( 37.3, 147.9)                | 87.4 ( 13.0, 161.9)                                           |
| Asia Pacific                                         | 34                          | 137.8         | 275.3 ( 198.2, 352.5)              | 16                      | 202.6         | 140.8 ( 51.8, 229.7)               | 134.6 ( 20.5, 248.7)                                          |
| Europe                                               | 151                         | 151.1         | 133.4 ( 106.6, 160.3)              | 80                      | 146.4         | 46.7 ( 22.0, 71.3)                 | 86.8 ( 50.5, 123.0)                                           |
| <b>Viral Subtype</b>                                 |                             |               |                                    |                         |               |                                    |                                                               |
| Clade B                                              | 357                         | 153.0         | 161.8 ( 142.0, 181.7)              | 192                     | 157.9         | 62.4 ( 44.2, 80.6)                 | 99.4 ( 72.6, 126.3)                                           |
| non-Clade B                                          | 34                          | 123.3         | 174.2 ( 115.2, 233.3)              | 14                      | 153.1         | 59.4 ( 9.0, 109.7)                 | 114.9 ( 39.8, 189.9)                                          |
| <b>Hepatitis B and/or C co-infection<sup>†</sup></b> |                             |               |                                    |                         |               |                                    |                                                               |
| No                                                   | 337                         | 145.3         | 168.2 ( 147.7, 188.6)              | 174                     | 158.4         | 69.0 ( 49.2, 88.8)                 | 99.2 ( 70.8, 127.5)                                           |
| Yes                                                  | 60                          | 180.3         | 140.1 ( 94.0, 186.2)               | 34                      | 148.1         | 30.8 ( 3.3, 58.2)                  | 109.3 ( 56.2, 162.4)                                          |

<sup>†</sup> Hepatitis B surface antigen positive or hepatitis C antibody positive.
